# Supplementary material for: The role of cyclic diketopiperazine in the formation of polypeptides on silica surfaces
Source: Research Square preprint supplement (doi:10.21203/rs.3.rs-7031859/v1), 2025-07-11
Supplement: Supplementary file 1 [file 8b355487225ea647337af00d.docx]

The role of cyclic diketopiperazine in the formation of polypeptides on silica surfaces

Ola El Samrout*, Rita Arnesi, Samuele Mistrali, Chiara Nannuzzi, Gloria Berlier*.

Department of Chemistry, NIS and INSTM Centers, University of Turin, via P. Giuria 7, 10125 Turin, Italy

**Supporting information**

**DKP deposited on silica from liquid phase by IWI**

*Thermal activation*


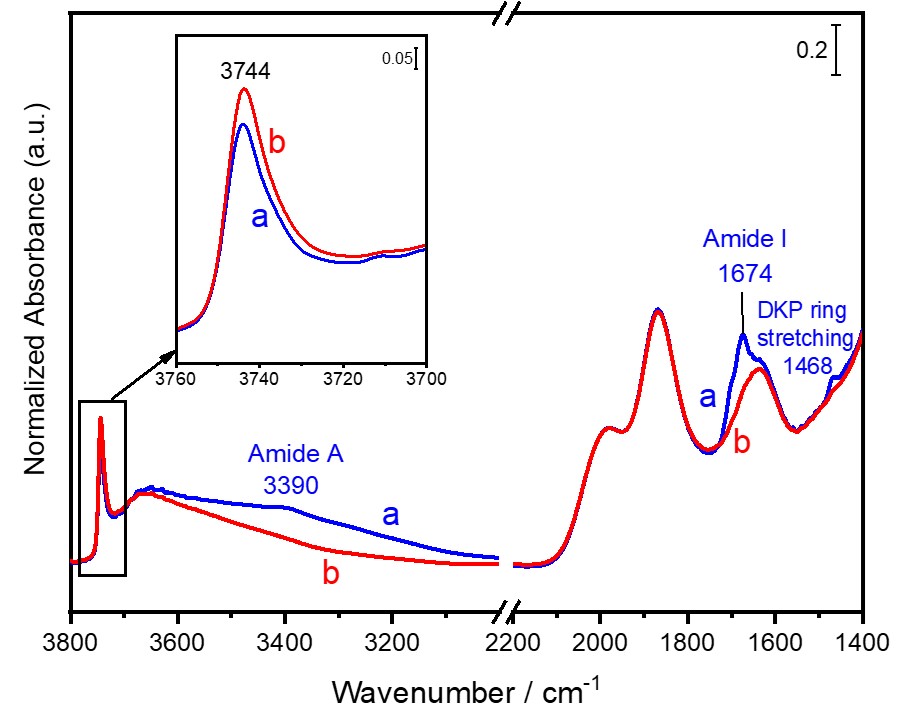


**Figure S1.** IR spectra of DKP2(IWI)/A50 measured after (a) DKP deposition by IWI followed by outgas at 140 °C for 30 min, then after (b) a thermal heating at 140 °C for 2.5 h under vacuum. The intensity of the silanols OH stretching region is enhanced for the sake of clarity.

*Wetting/drying cycles*


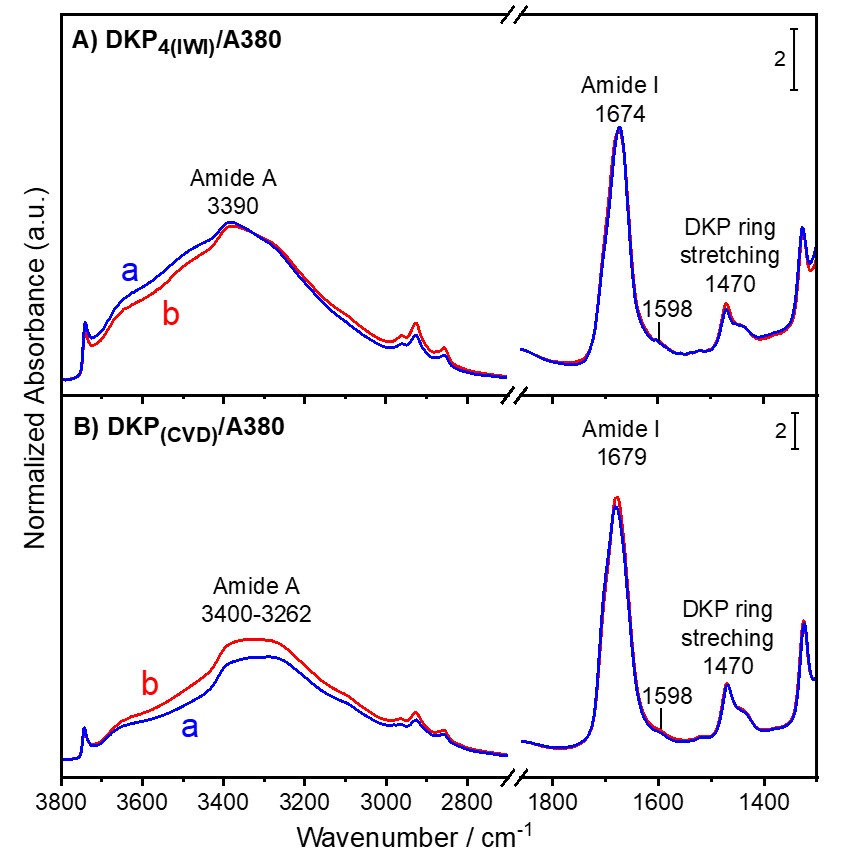


**Figure S2.** IR spectra of DKP4(IWI)/A380 (Panel A) and DKP(CVD)/A380 (Panel B) measured after (a) DKP deposition by IWI and outgas at rt, or after DKP sublimation by CVD for 2.5 h at 160 °C under vacuum, respectively. Spectra (b) in both panels represent each the last spectrum measured at the end of the wetting/drying cycles performed on both samples. The wetting/drying cycles done consist of an admission of water vapor for 20 min and a direct heating at 80 °C for 30 min while in contact with water vapor. This is followed by a drying step consisting of an outgas at rt then at 80 °C for 30 min. The cycles are repeated until invariance of spectra.


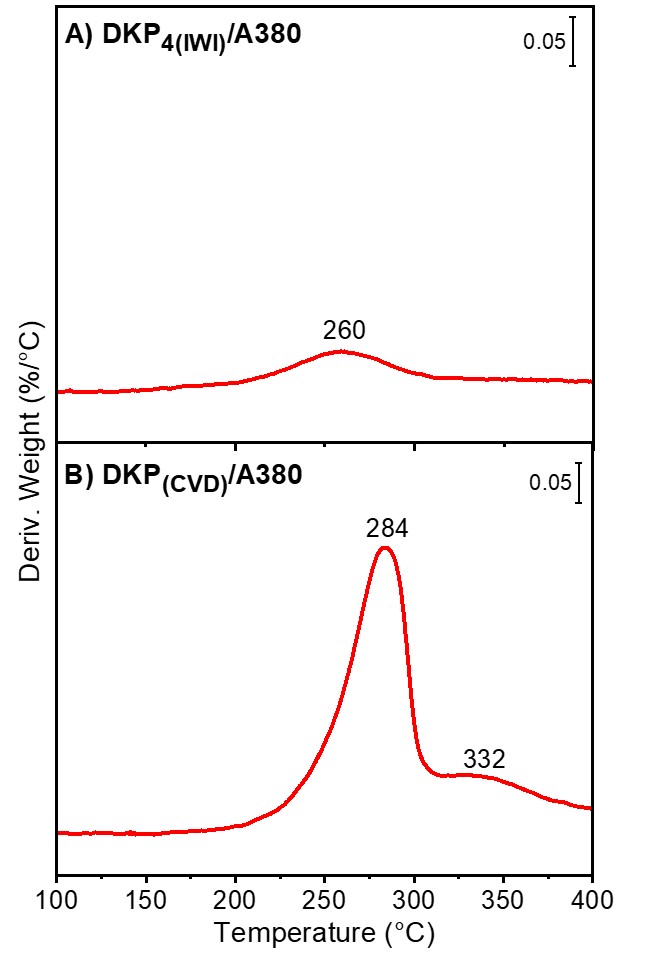


**Figure S3.** Derivative thermograms (DTG) measured directly after wetting/drying cycles performed on two samples prepared by (A) 4 wt% DKP deposition by IWI and outgas on silica A380, designated as DKP4(IWI)/A380; or by (B) DKP sublimation by CVD for 2.5 h at 160 °C under vacuum, designated as DKP (CVD)/A380.


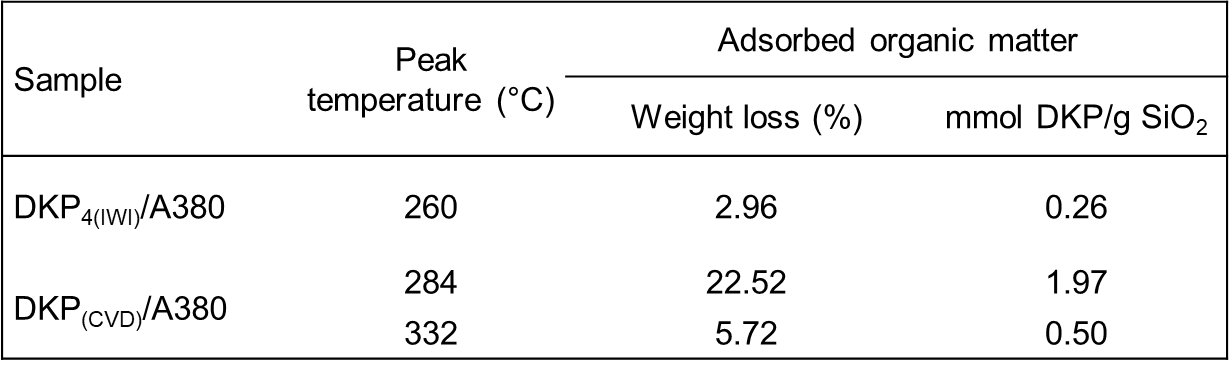


**Table S1.** Table presenting the adsorbed amount of organic matter (in terms of DKP) after wetting/drying cycles on both samples DKP4(IWI)/A380 obtained after DKP deposition by IWI on silica A380; and DKP (CVD)/A380 obtained after DKP sublimation by CVD for 2.5 h under vacuum. These values are calculated from the integration of DTG peaks of Figure S3 for the corresponding samples.

*Reaction with Gly monomers dosed from the gas phase*


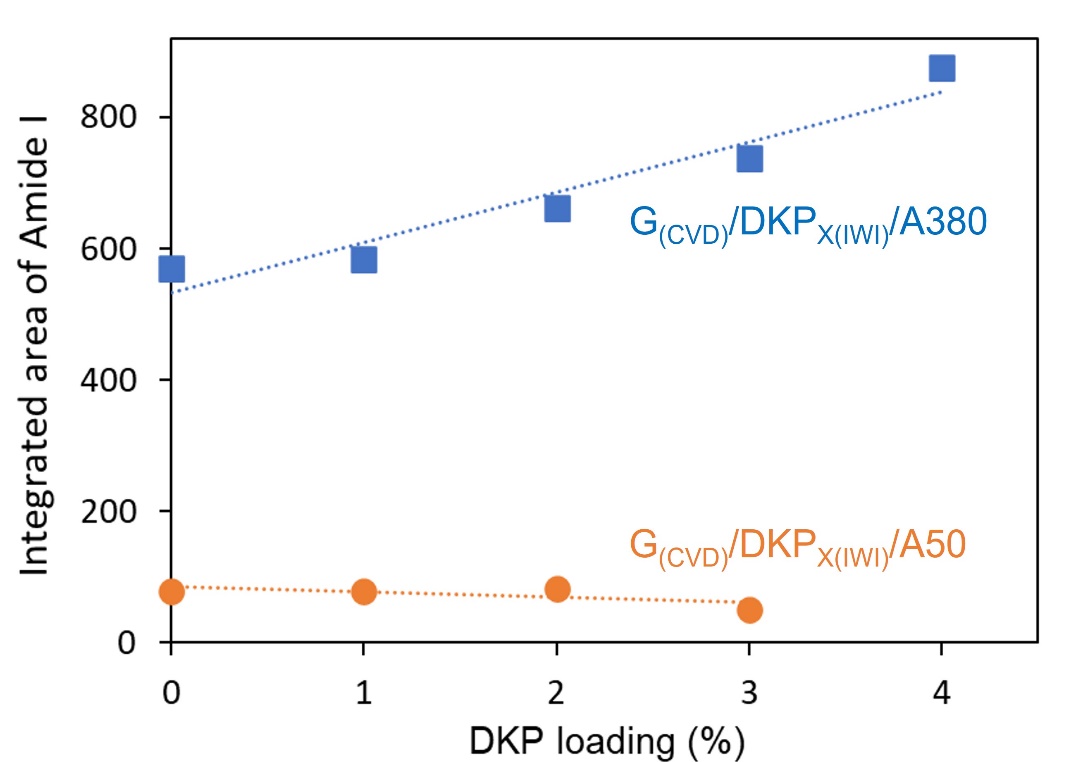


**Figure S4:** Evolution of the amide I band intensity obtained after 2.5 h Gly sublimation by CVD as function of DKP loading (%) for both series of samples: G(CVD)/DKPx(IWI)/A50 and G(CVD)/DKPx(IWI)/A380; where x refers to the different DKP loadings used.

**DKP deposited on silica from gas phase by CVD**

*Reaction with Gly monomers dosed from the gas phase*


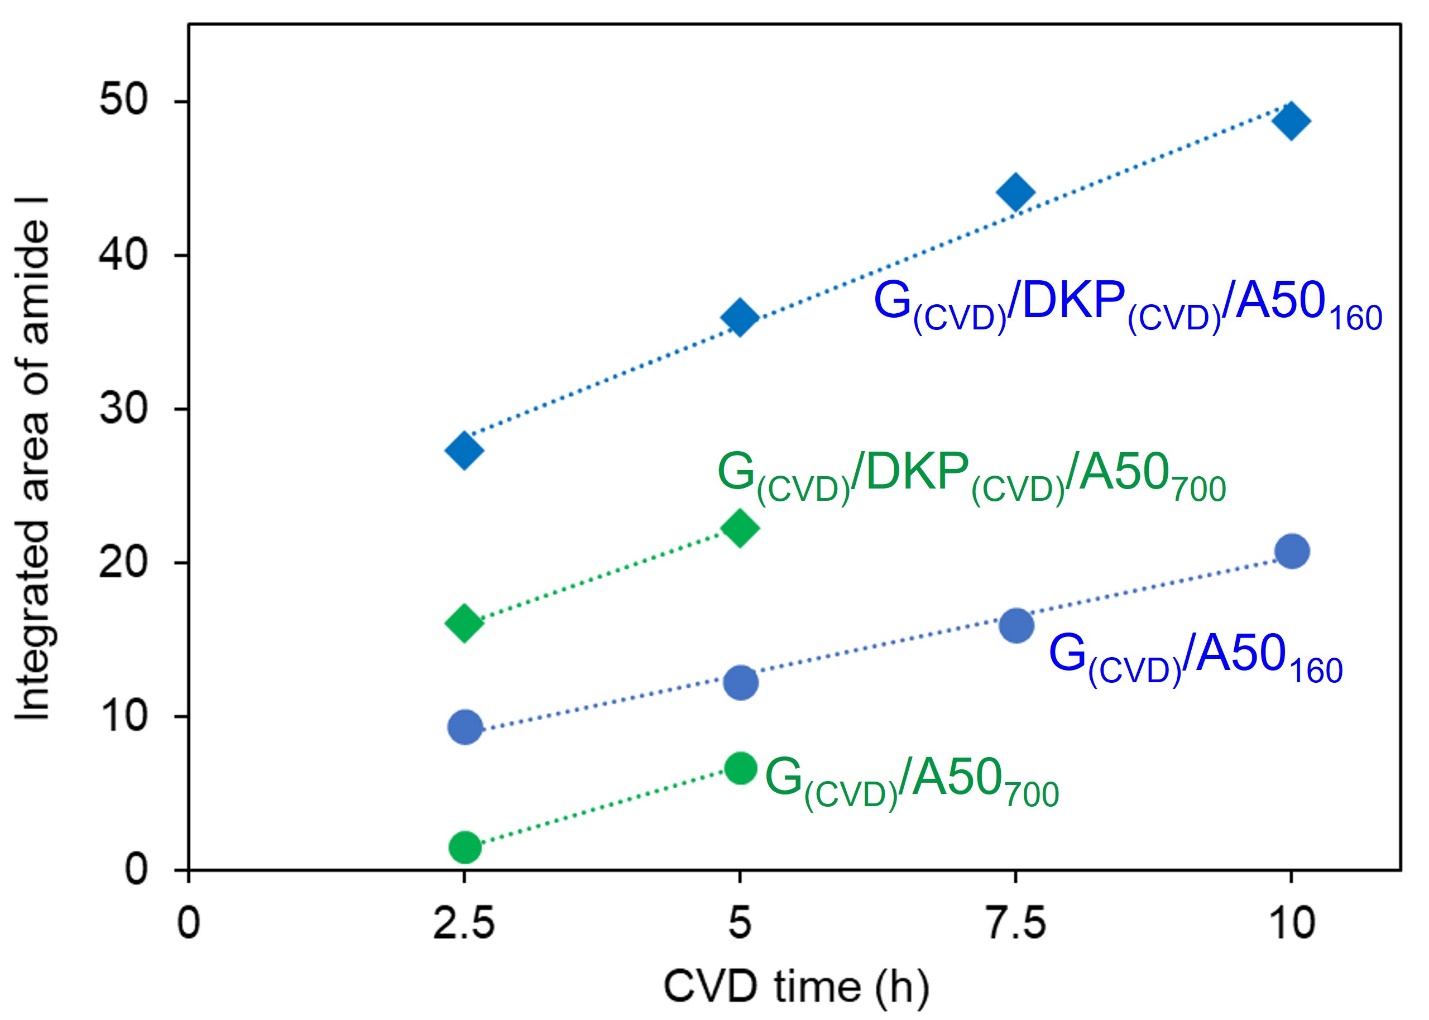


**Figure S5:** Evolution of the amide I band intensity as function of CVD time (h) for G(CVD)/A50160, G(CVD)/DKP(CVD)/A50160, G(CVD)/A50700, and G(CVD)/DKP(CVD)/A50700 samples prepared by in-situ CVD with or without a pre-deposition of DKP by sublimation. Two different silica supports are used: one outgassed at 160 °C for 2 h under vacuum and the other pre-treated at 700 °C for 2.5 h.


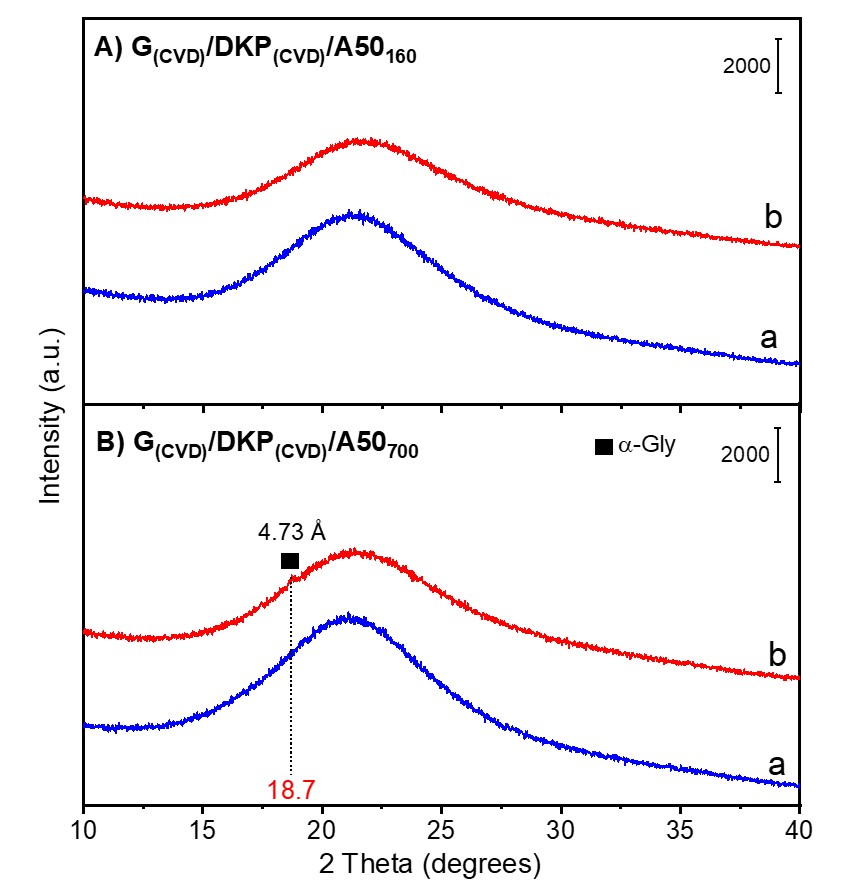


**Figure S6**: XRD profiles measured on (A) G(CVD)/DKP(CVD)/A50160 and (B) G(CVD)/DKP(CVD)/A50700: (a) after outgassing at 160 °C for 2 h under vacuum (Panel A) or pre-treatment in a muffle furnace at 700 °C for 2.5 h (Panel B); (b) after DKP deposition by CVD for 2.5 h under vacuum followed by Gly sublimation by CVD for 10 (Panel A) or 5 h (Panel B) and H/D exchange cycles.


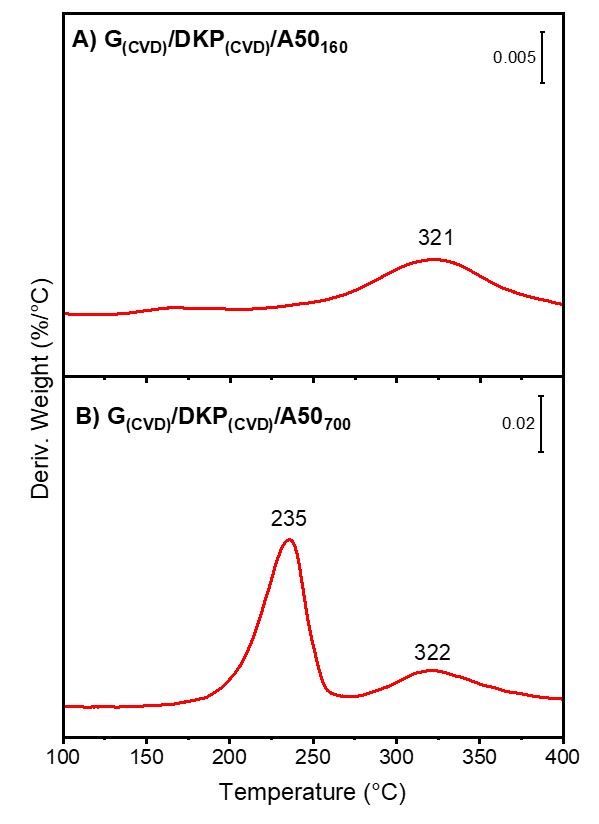


**Figure S7:** Derivative thermograms (DTG) for (A) G(CVD)/DKP(CVD)/A50160 and (B) G(CVD)/DKP(CVD)/A50700 samples measured after DKP deposition by CVD for 2.5 h under vacuum followed by Gly sublimation by CVD for 10 (Panel A) or 5 h (Panel B) and H/D exchange cycles.


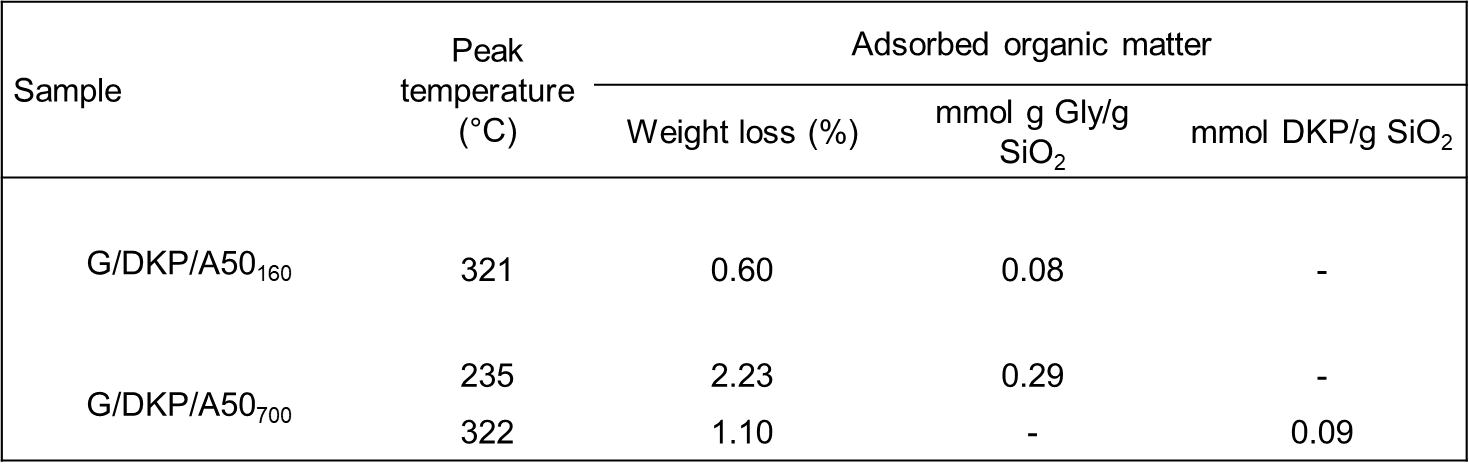


**Table S2:** Table presenting the adsorbed amount of organic matter (in terms of DKP or Gly) on both G(CVD)/DKP(CVD)/A50160 and G(CVD)/DKP(CVD)/A50700 samples. These values are calculated from the integration of DTG peaks of Figure S7 for the corresponding samples.

*CVD of DKP on silica-grafted Gly oligomers*


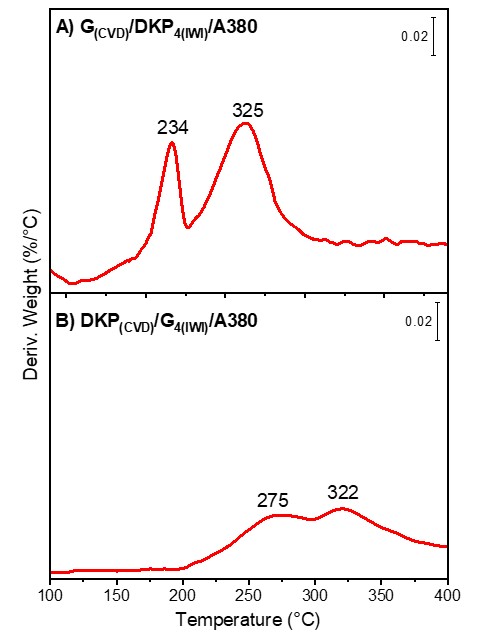


**Figure S8.** Derivative thermograms (DTG) for samples obtained after (A) 4 wt% DKP deposition by IWI and outgas on silica A380 followed by CVD sublimation of Gly monomers at 160 °C for 2.5 h under vacuum, designated by G(CVD)/DKP4(IWI)/A380; and after (B) 4 wt% Gly deposition by IWI and activation at 160 °C on silica A380 followed by DKP adsorption by CVD at 160 °C for 2.5 h under vacuum, designated by DKP(CVD)/G4(IWI)/A380.


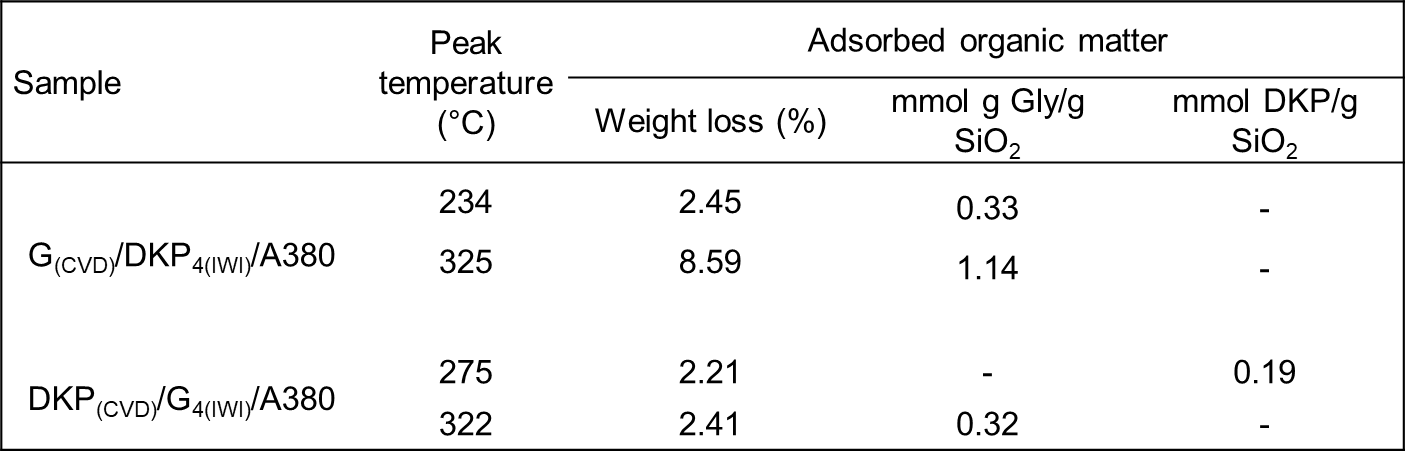


**Table S3.** Table presenting the adsorbed amount of organic matter (in terms of DKP or Gly) on both samples G(CVD)/DKP4(IWI)/A380 obtained after 4 wt% DKP deposition by IWI and outgas then Gly sublimation by CVD for 2.5 h; and DKP(CVD)/G4(IWI)/A380 obtained after 4 wt% Gly deposition by IWI and activation at 160 °C then DKP sublimation by CVD for 2.5 h at 160 °C under vacuum. These values are calculated from the integration of DTG peaks of Figure S6 for the corresponding samples.

**Structural dynamics and secondary structures of peptides formed by DKP opening on silica**


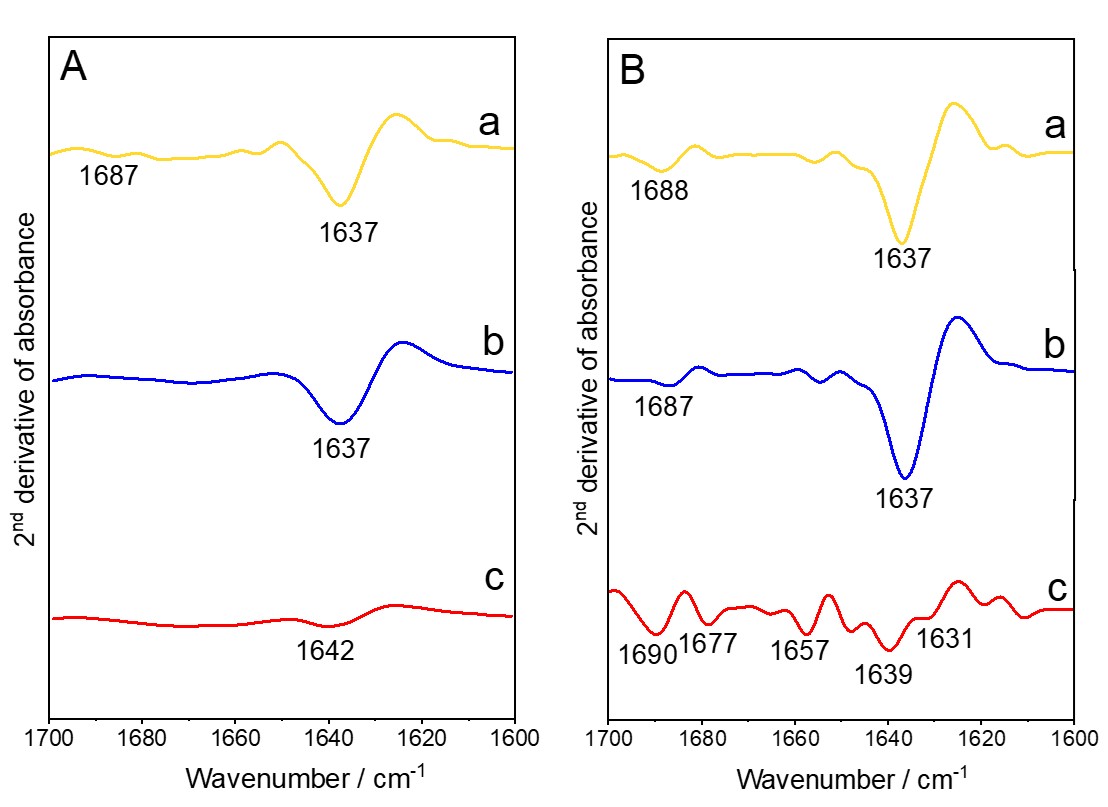


**Figure S9.** Second derivative in the amide I region of the IR spectra recorded directly after (Panel A) 2.5 h of Gly sublimation by CVD, and then after (Panel B) H/D exchange and outgassing of D2O until invariance of spectra of (a) bare silica A50, (b) G(CVD)/DKP1(IWI)/A50, and (c) G(CVD)/DKP3(IWI)/A50.


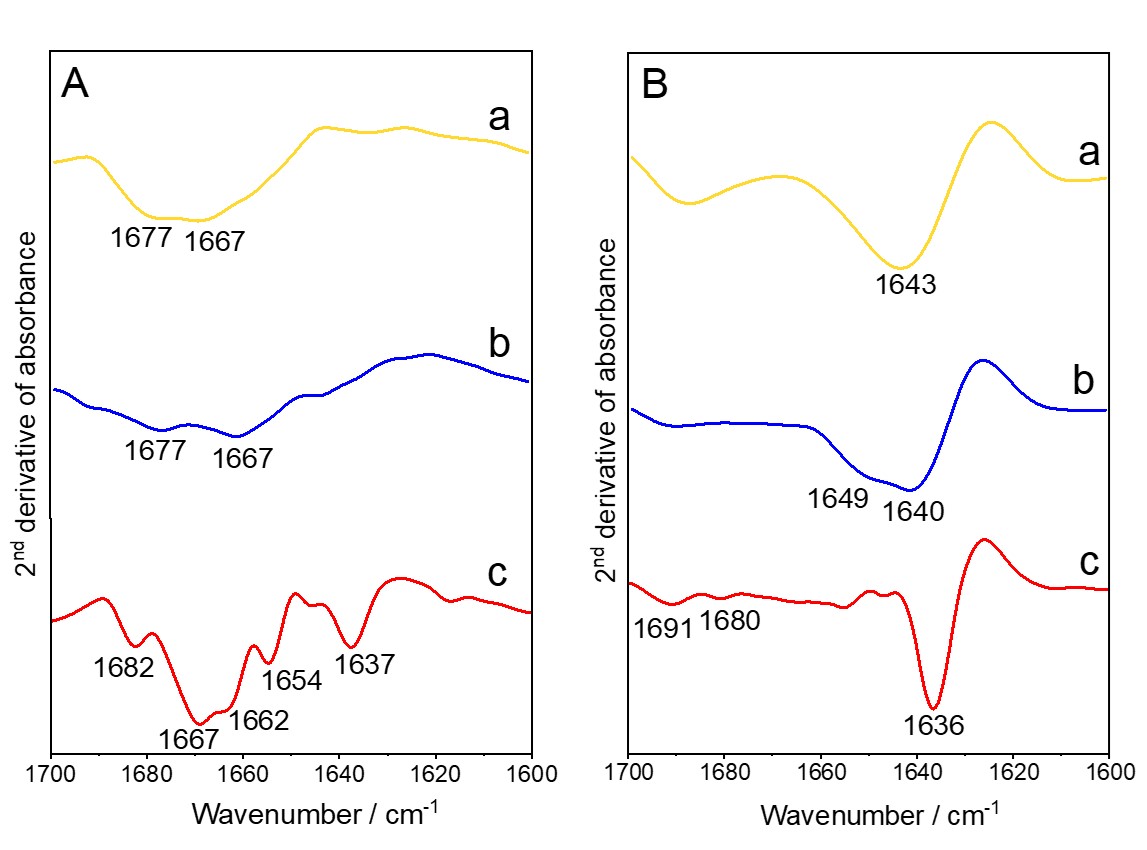


**Figure S10.** Second derivative in the amide I region of the IR spectra recorded directly after (Panel A) 2.5 h of Gly sublimation by CVD, and then after (Panel B) H/D exchange and outgassing of D2O until invariance of spectra of (a) bare silica A380, (b) G(CVD)/DKP1(IWI)/A380, and (c) G(CVD)/DKP4(IWI)/A380.


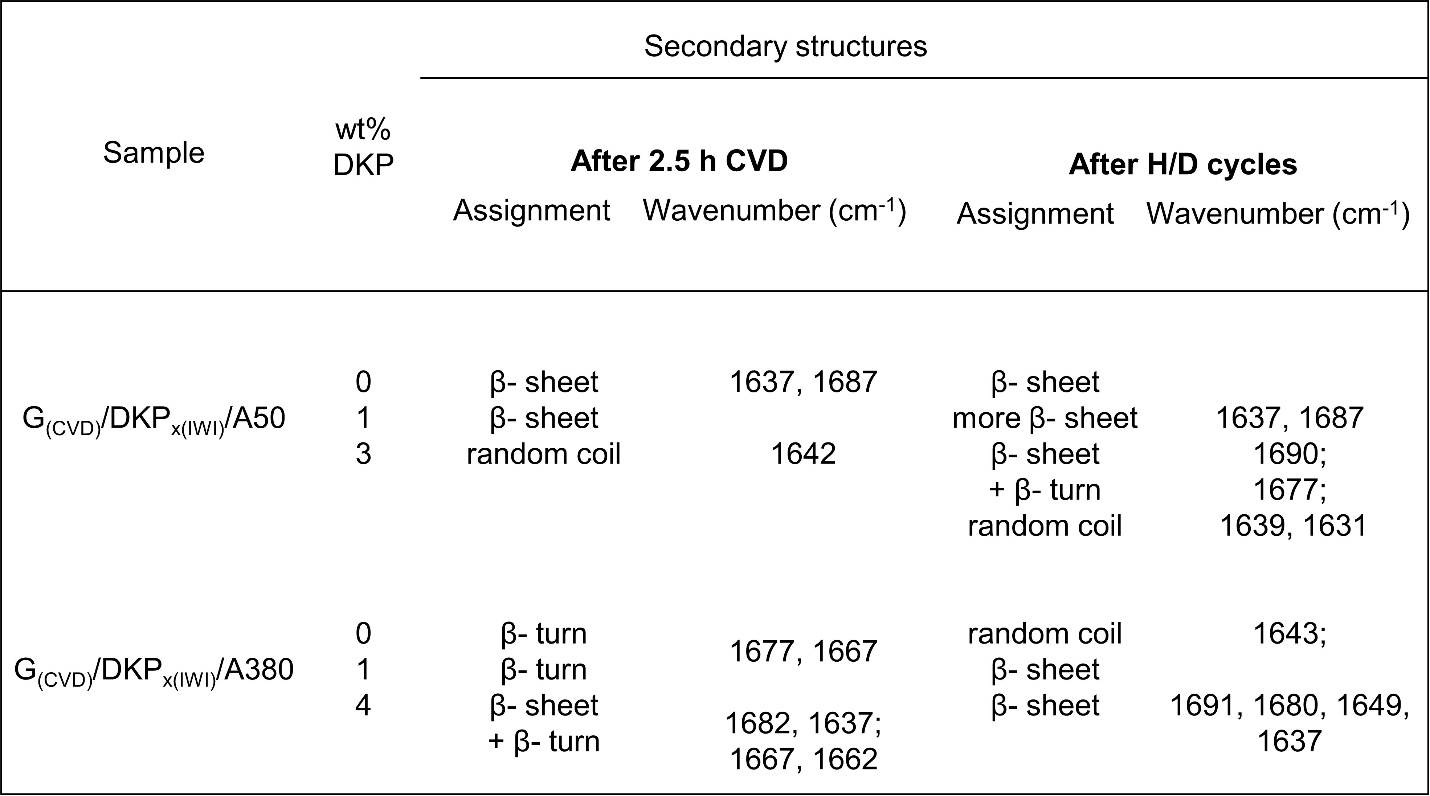


**Table S4.** Table presenting the different types of secondary structures formed after 2.5 h CVD then after H/D cycles for both sets of samples G(CVD)/DKPx(IWI)/A50 and G(CVD)/DKPx(IWI)/A380, deduced from the computation of the second derivative of the corresponding IR spectra in Figures S7 and S8.
